# Supplementary material
Source: PubMed Central journal article supplement (PMC2624570)

## SUPPORTING INFORMATION.

Triazolopyrimidine-based dihydroorotate dehydrogenase inhibitors with potent and selective activity against the malaria parasite, *Plasmodium falciparum*

Margaret A. Phillips, Ramesh Gujjar, Nicholas A. Malmquist, John White, Farah El Mazouni, Jeffrey Baldwin, Pradipsinh K. Rathod

**Content:** Experimental section describing enzyme and parasite assays, and general chemical and analytical methods. HPLC traces demonstrating purity of compounds 7 and 20.

### Experimental Methods.

*Steady-State Kinetic Analysis.* Steady-state kinetic assays were performed as follows. The reduction of 2,6-dichloroindophenol (DCIP; 0.12 mM) was followed at 600 nm ( $\epsilon=18.8 \text{ mM}^{-1}\text{cm}^{-1}$ ) using enzyme ( $E_T = 5 - 10 \text{ nM}$ ) and substrates (0.2 mM L-dihydroorotate and 0.02 mM CoQ<sub>D</sub>) in assay buffer (100 mM HEPES, pH 8.0, 150 mM NaCl, 10% Glycerol, 0.1% Triton) at 20°C. Background CoQ-independent oxidase activity (<3% of activity) was subtracted from the data prior to analysis. For potent compounds activity was confirmed by the direct detection of orotic acid at 296 nm ( $\epsilon_{296} = 4.30 \text{ mM}^{-1}\text{cm}^{-1}$ ), which was also used for  $K_i$  determination. Substrate and buffer conditions were as above except oxygen was depleted by the inclusion of an oxidase/catalase system (0.1 mg/ml glucose oxidase, 0.02 mg/ml catalase, and 50 mM glucose).

*Pre-steady-state kinetic analysis by stopped flow spectroscopy.* Rapid kinetic analysis was performed as described previously.<sup>30</sup> The transition of FMN between the oxidized and reduced state was monitored at 485 nm on a Bio-Logic SFM-3 stopped-flow instrument. For DHO-dependent reactions, enzyme (final concentration 20  $\mu\text{M}$ ) was mixed with DHO (125  $\mu\text{M}$  final concentration) in assay buffer at 4 °C. For CoQ<sub>D</sub>-dependent reactions, oxygen was depleted from the reactions using the oxidase/catalase system (described above) and by bubbling with nitrogen. Oxidized enzyme (45  $\mu\text{M}$ ) was reduced with a limiting amount of DHO (30  $\mu\text{M}$ ) before loading on to the stopped-flow instrument. Enzyme reduced in this manner (final concentration 10  $\mu\text{M}$ ) was then mixed with CoQ<sub>D</sub> (100  $\mu\text{M}$  final concentration). For inhibitor analysis enzyme (10 or 20  $\mu\text{M}$  final concentration) was pre-mixed with inhibitor (50  $\mu\text{M}$  final concentration) prior to reaction with substrates and monitoring of the reaction.

*P. falciparum cell culture.* Parasite clones 3D7, FCR3, K1, Dd2, HB3 and D6 were propagated in Gibco-Invitrogen RPMI-1640 supplemented with 20% human type A+ plasma and 2% (w/v) red blood cells.<sup>34</sup> Low-passage L1210 mouse leukemia cells (American Type Culture Collection) were also grown in plasma-supplemented RPMI-1640. Blood products were obtained from Biochemed Services, Virginia. To study inhibition of cell proliferation [<sup>3</sup>H]-hypoxanthine uptake was measured in drug-treated *P. falciparum* infected-erythrocytes and L1210 cells described previously.<sup>15</sup>

*Curve fitting and error analysis.* Enzyme IC<sub>50</sub> and parasite EC<sub>50</sub> data were determined over a range of inhibitor concentrations using triplicate data points at each concentration. IC<sub>50</sub> values were determined using the graphing program Prism (GraphPad). Data reported in Table 1 represents the average of at least 2 independent experiments.

*General Chemistry.* Unless otherwise indicated, all anhydrous solvents were commercially obtained and stored under nitrogen. Reactions were performed under an atmosphere of dry nitrogen in oven-dried glassware and were monitored for completeness by thin layer chromatography (TLC) using silica gel 60 F-254 (0.25 mm) plates with detection with UV light.

**General Analytical Methods.**  $^1\text{H}$  NMR spectra were recorded on dilute solutions in  $\text{CDCl}_3$  or  $\text{DMSO-}d_6$  at 300 MHz. Chemical shifts are reported in parts per million ( $\delta$ ) downfield from tetramethylsilane (TMS). Coupling constants ( $J$ ) are reported in Hz. Electrospray ionization mass spectra were acquired on a Bruker Esquire Liquid Chromatograph-Ion Trap Mass Spectrometer. Flash chromatography was carried out with silica gel (32-63  $\mu\text{m}$ ). Melting points were taken in capillary tubes (Mel Temp apparatus) and are uncorrected. Compound **7** was crystallized in  $\text{CH}_2\text{Cl}_2/\text{CH}_3\text{OH}$ . Compounds were subjected to HPLC analysis on an automated Varian Prep star system using a gradient of 20% MeOH to 100% MeOH (with 0.1% trifluoroacetic acid) over 30 min, using a YMC S5 ODS column (20  $\times$  100 mm, Waters, Inc.).

**Figure 1S.** A. HPLC trace for compound **7**. B. HPLC trace for compound **20**. Purified compounds eluted as single peak, and these peak fractions had the expected *Pf*DHODH inhibitor activity ( $\text{IC}_{50}$  = 0.05 and 0.1  $\mu\text{M}$  respectively). The HPLC method is described in the Experimental Section.

**A.**

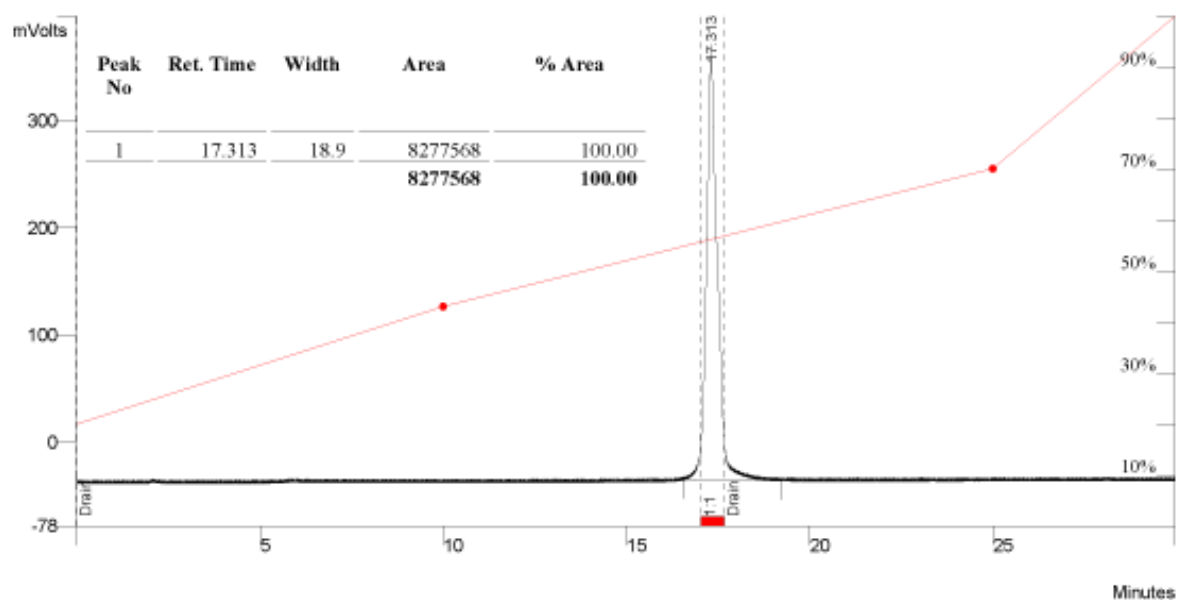

**B.**

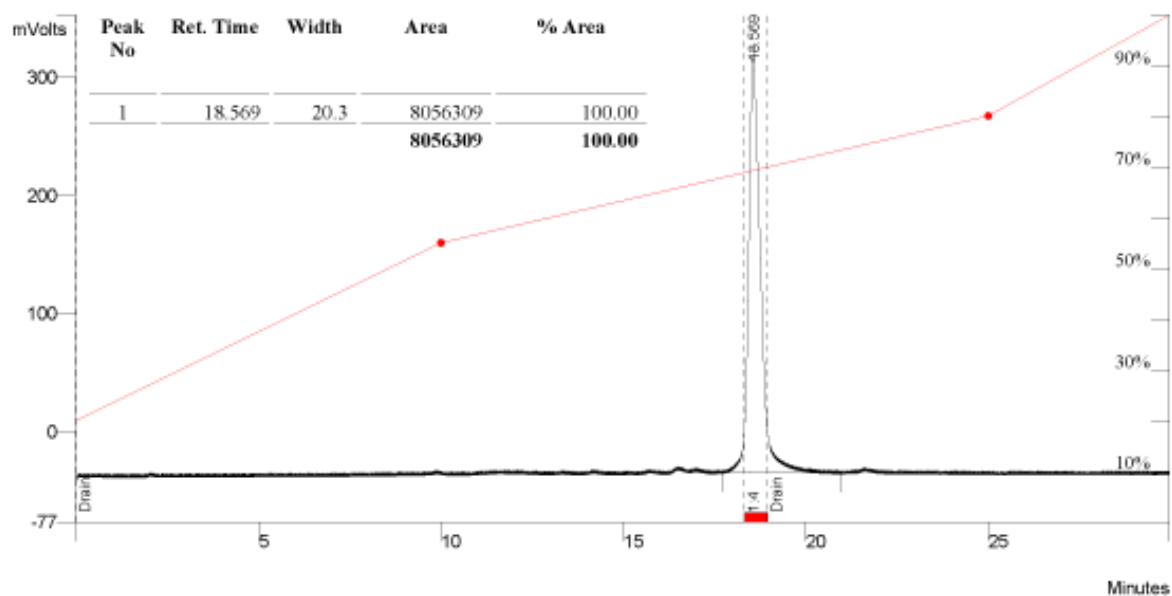

Supplement: NIHMS68364-supplement-1.pdf [file NIHMS68364-supplement-1.pdf]
